# Supplementary material for: Biomimetic Synthesis of PANI/Graphitic Oxidized Carbon Nitride for Supercapacitor Applications
Source: MDPI journal article supplement (doi:10.3390/polym14183913), 2022-09-19
Supplement: s1 [file s1]

## Supplementary Materials

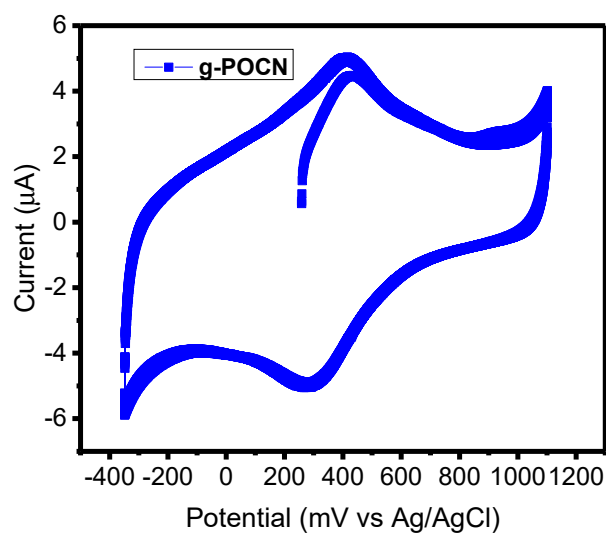

**Figure S1.** Cyclic voltammetry g-POCN in 0.5 M  $\text{H}_2\text{SO}_4$  at 100 mV/s (working potential  $-0.35$  V to 1 V).

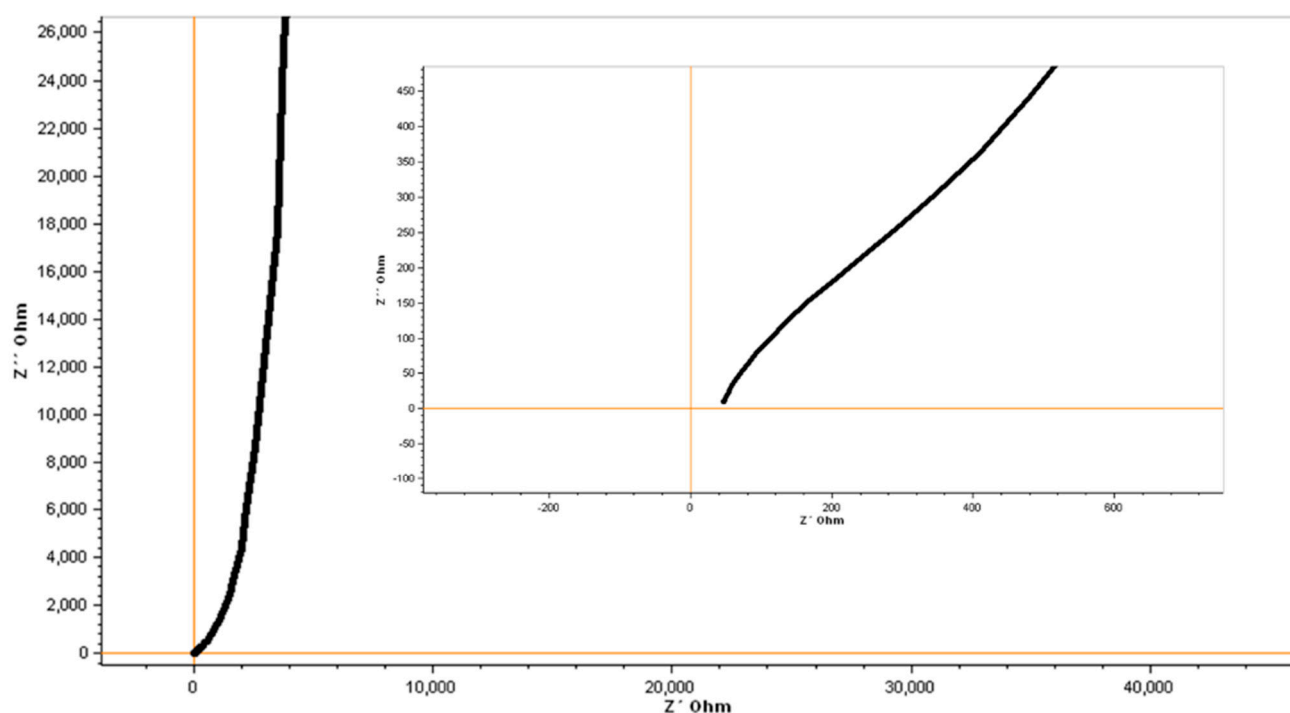

**Figure S2.** EIS of g-POCN in 0.5 M  $\text{H}_2\text{SO}_4$  obtained at scan interval from 100 mHz to 100 kHz with amplitude of 10 mV VA to Eoc.

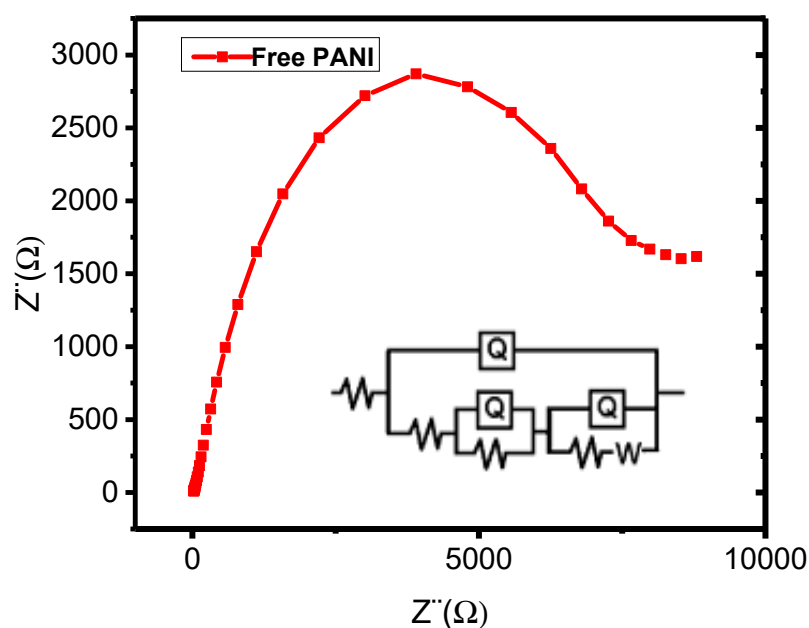

**Figure S3.** Nyquist diagram of PANI in 0.5 M H<sub>2</sub>SO<sub>4</sub> obtained at scan interval from 100 mHZ to 100 kHz with amplitude of 10 mV VA to Eoc.

**Table S1.** Relevant studies recently reported and their comparison with the present work.

| Material                       | Method of synthesis    | Electrolyte                        | Potential window (V) | Specific capacitance F/g (at current density, A/g, scan rate) | -Capacity retention<br>-Cycle number<br>-Current density (A/g) | Year | Ref |
|--------------------------------|------------------------|------------------------------------|----------------------|---------------------------------------------------------------|----------------------------------------------------------------|------|-----|
| CoFe-LDH/PANI                  | Hydrothermal synthesis | KOH 6M                             | -0.1 to 0.7          | 1686 (1)                                                      | 98%<br>10000<br>20                                             | 2022 | [1] |
| PANI/CNT/Elastic polymer fiber | Electro-polymerization | PVA/H <sub>3</sub> PO <sub>4</sub> | 0.0 to 1             | 111.6 (0.5)                                                   | 90%<br>2000<br>1                                               | 2014 | [2] |
| PANI/CNT/Elastic cord          | Electro-polymerization | PVA/H <sub>2</sub> SO <sub>4</sub> | -0.2 to 0.6          | 394                                                           | 75.5%<br>12000<br>30                                           | 2018 | [3] |
| PANI-MWCNT-Ni(OH) <sub>2</sub> | Chemical precipitation | KOH 1 M                            | 0.0 to 0.49          | 1013 (1)                                                      | 75%<br>1000<br>25                                              | 2020 | [4] |
| PANI@Co-Porphyrins             | /                      | H <sub>2</sub> SO <sub>4</sub> 1 M | 0 to 0.6             | 823 (0.5)                                                     | 91%<br>1000<br>5                                               | 2019 | [5] |
| GO/PANI/CNT-SS                 | /                      | KCl 1 M                            | 1.0 to 1.6           | 331.49 (5 mV/s)                                               | 83%<br>5000<br>/                                               | 2019 | [6] |
| PANI/PEDOT/PANI/               | /                      | PVA/H <sub>2</sub> SO <sub>4</sub> | 0.2 to -0.4          | 61 F/cm <sup>3</sup> (1 A/cm <sup>3</sup> )                   | 73%<br>1000<br>/                                               | 2019 | [7] |

|                                  |                                                        |                                         |             |             |                    |      |              |
|----------------------------------|--------------------------------------------------------|-----------------------------------------|-------------|-------------|--------------------|------|--------------|
| UrGO//<br>PEDOT-MoS <sub>2</sub> |                                                        |                                         |             |             |                    |      |              |
| PANI/GO/<br>PDMS                 | Micro-emul-<br>sion <i>in-situ</i><br>polymerization   | LiCl<br>1 M                             | − 0.2 to 1  | 576 (1)     | /<br>10000<br>5    | 2018 | [8]          |
| BiVO <sub>4</sub> /<br>PANI      | <i>in situ</i> chemical<br>oxidative<br>polymerization | KOH<br>1 M                              | 0 to 0.66   | 701 (1)     | 95.4%<br>5000<br>1 | 2020 | [9]          |
| co-MOF/<br>PANI                  | <i>in situ</i> chemical<br>oxidative<br>polymerization | KOH<br>1 M                              | 0 to 0.62 V | 504 (1)     | 90%<br>5000<br>2   | 2020 | [10]         |
| CeO <sub>2</sub> /<br>PANI       | /                                                      | HCl<br>1 M                              | 0 to 0.8 V  | 1452 (2)    | ~0%<br>1500<br>20  | 2018 | [11]         |
| PANI/<br>g-POCN                  | Biomimetic<br>Synthesis                                | H <sub>2</sub> SO <sub>4</sub><br>0.5 M | −0.2 to 0.9 | 450.5 (0.2) | 80<br>500<br>3     | 2022 | This<br>work |

## References

1. Mahmood, A.; Zhao, B.; Javed, M.S.; He, D.; Cheong, W.; Han, D.; Niu, L. Unprecedented Dual Role of Polyaniline for Enhanced Pseudocapacitance of Cobalt–Iron Layered Double Hydroxide. *Macromol. Rapid Commun.* **2022**, *43*, 2100905. <https://doi.org/10.1002/marc.202100905>.
2. Zhang, Z.; Deng, J.; Li, X.; Yang, Z.; He, S.; Chen, X.; Guan, G.; Ren, J.; Peng, H. Superelastic Supercapacitors with High Performances during Stretching. *Adv. Mater.* **2015**, *27*, 356–362. <https://doi.org/10.1002/adma.201404573>.
3. Ren, D.; Dong, L.; Wang, J.; Ma, X.; Xu, C.; Kang, F. Facile Preparation of High-Performance Stretchable Fiber-Like Electrodes and Supercapacitors. *ChemistrySelect* **2018**, *3*, 4179–4184. <https://doi.org/10.1002/SLCT.201702725>.
4. Thomas, L.; Pete, S.; Chaitra, K.; Venkatesh, K.; Gopalkrishna, B.; Nagaraju, K. Facile synthesis of PANI-MWCNT-Ni(OH)<sub>2</sub> ternary composites and study of their performance as electrode material for supercapacitors. *Diam. Relat. Mater.* **2020**, *106*, 107853. <https://doi.org/10.1016/J.DIAMOND.2020.107853>.
5. Deyab, M.A.; Mele, G. PANI@Co-Porphyrins composite for the construction of supercapacitors. *J. Energy Storage* **2019**, *26*, 101013. <https://doi.org/10.1016/J.EST.2019.101013>.
6. Dasdevan, N.; Abdah, M.A.A.M.; Sulaiman, Y. Facile Electrodeposition of Poly(3,4-ethylenedioxythiophene) on Poly(vinyl alcohol) Nanofibers as the Positive Electrode for High-Performance Asymmetric Supercapacitor. *Energies* **2019**, *Vol. 12*, Page 3382 **2019**, *12*, 3382. <https://doi.org/10.3390/EN12173382>.
7. Khoh, W.H.; Wee, B.H.; Hong, J.D. High performance flexible solid-state asymmetric supercapacitor composed of a polyaniline/PEDOT/polyaniline/ultralarge reduced graphene oxide tetralayer film and a PEDOT/MoS<sub>2</sub> composite film. *Colloids Surfaces A Physicochem. Eng. Asp.* **2019**, *581*, 123815. <https://doi.org/10.1016/J.COLSURFA.2019.123815>.
8. Li, K.; Huang, Y.; Liu, J.; Sarfraz, M.; Agboola, P.O.; Shakir, I.; Xu, Y. A three-dimensional graphene framework-enabled high-performance stretchable asymmetric supercapacitor. *J. Mater. Chem. A* **2018**, *6*, 1802–1808. <https://doi.org/10.1039/C7TA09041B>.
9. Srinivasan, R.; Elaiyappillai, E.; Anandaraj, S.; Duvaragan, B. kumar; Johnson, P.M. Study on the electrochemical behavior of BiVO<sub>4</sub>/PANI composite as a high performance supercapacitor material with excellent cyclic stability. *J. Electroanal. Chem.* **2020**, *861*, 113972. <https://doi.org/10.1016/J.JELECHEM.2020.113972>.
10. Srinivasan, R.; Elaiyappillai, E.; Nixon, E.J.; Sharmila Lydia, I.; Johnson, P.M. Enhanced electrochemical behaviour of Co-MOF/PANI composite electrode for supercapacitors. *Inorganica Chim. Acta* **2020**, *502*, 119393. <https://doi.org/10.1016/J.ICA.2019.119393>.
11. Nallappan, M.; Gopalan, M. Fabrication of CeO<sub>2</sub>/PANI composites for high energy density supercapacitors. *Mater. Res. Bull.* **2018**, *106*, 357–364. <https://doi.org/10.1016/J.MATERRESBULL.2018.05.025>.
